# Supplementary material for: Exocytosis of peptide functionalized gold nanoparticles in endothelial cells
Source: Royal Society of Chemistry journal article supplement (doi:10.1039/c2nr31064c), 2012-01-01
Supplement: c2nr31064c.pdf [file c2nr31064c.pdf]

## ***Supporting information for:***

### **Exocytosis of peptide functionalized gold nanoparticles in endothelial cells.**

*D. Bartczak,<sup>‡</sup> Simone Nitti,<sup>¥</sup> Timothy M. Millar<sup>†</sup> and Antonios G. Kanaras<sup>‡\*</sup>*

<sup>‡</sup> *Physics and Astronomy, University of Southampton, Southampton, SO17 1BJ, UK;* <sup>†</sup>*Faculty of Medicine, Southampton General Hospital, Tremona Road, Southampton, SO16 6YD, UK;* <sup>¥</sup> *Instituto Italiano di Tecnologia Via Morego 30, 16163, Genova, Italy*

#### **Table of Contents:**

**Table S1.** DLS and zeta potential parameters of P<sub>inh</sub>-OEG-NPs and P<sub>mut</sub>-OEG-NPs.

**Table S2.** ICP-AES measurements of the total gold content within HUVECs after 4h treatment with P<sub>inh</sub>-OEG-NPs and P<sub>mut</sub>-OEG-NPs.

**Table S3.** ICP-AES measurements of the total gold content within HUVECs and in the growth media after 2, 4 and 6h of NPs exocytosis.

**Table S1.** DLS and zeta potential parameters of P<sub>inh</sub>-OEG-NPs and P<sub>mut</sub>-OEG-NPs.

| NPs                       | Media      | DLS  | Average | Stdev | Zeta  | Average | Stdev |
|---------------------------|------------|------|---------|-------|-------|---------|-------|
| P <sub>mut</sub> -OEG-NPs | Introduced | 32.5 | 34      | 4.0   | -22.7 | -16.9   | 5.0   |
|                           |            | 31   |         |       | -14.2 |         |       |
|                           |            | 38.5 |         |       | -13.8 |         |       |
|                           | Exocytosed | 32.6 | 36.1    | 3.0   | -19.9 | -18.8   | 3.5   |
|                           |            | 37.8 |         |       | -21.6 |         |       |
|                           |            | 37.9 |         |       | -14.9 |         |       |
| P <sub>inh</sub> -OEG-NPs | Introduced | 32   | 36.2    | 4.0   | -20.1 | -19.6   | 2.5   |
|                           |            | 39.9 |         |       | -21.8 |         |       |
|                           |            | 36.7 |         |       | -16.9 |         |       |
|                           | Exocytosed | 44.2 | 41.5    | 3.0   | -21.1 | -19.2   | 2.0   |
|                           |            | 42   |         |       | -19.3 |         |       |
|                           |            | 38.3 |         |       | -17.2 |         |       |

**Table S2.** ICP-AES measurements for the estimation of the total gold content within HUVECs after 4h treatment with P<sub>inh</sub>-OEG-NPs or P<sub>mut</sub>-OEG-NPs.

| NPs type                  | Gold [ppm] | Gold [g/ml] | Gold atoms per NP | NP weight [g] | NPs/ml      | NPs/cell  | Average |
|---------------------------|------------|-------------|-------------------|---------------|-------------|-----------|---------|
| P <sub>mut</sub> -OEG-NPs | 1.074      | 1.07E-06    | 105448            | 3.45E-17      | 31130434783 | 311304.35 | 337053  |
|                           | 1.116      | 1.12E-06    |                   |               | 32347826087 | 323478.26 |         |
|                           | 1.2985     | 1.30E-06    |                   |               | 37637681159 | 376376.81 |         |
| P <sub>inh</sub> -OEG-NPs | 0.901      | 9.01E-07    | 105448            | 3.45E-17      | 26115942029 | 261159.42 | 268937  |
|                           | 0.964      | 9.64E-07    |                   |               | 27942028986 | 279420.29 |         |
|                           | 0.9185     | 9.19E-07    |                   |               | 26623188406 | 266231.88 |         |

**Table S3.** ICP-AES measurements for the estimation of the total gold content within HUVECs and in the growth media after 2, 4 and 6h of NPs exocytosis.

| NPs type                  | Exocytosis [h] | NPs location   | Gold [ppm] | Gold [g/ml] | Gold atoms per NP | NP weight [g] | NPs/ml        | NPs/cell     | Average        | % of NPs     | NPs total            |              |                    |
|---------------------------|----------------|----------------|------------|-------------|-------------------|---------------|---------------|--------------|----------------|--------------|----------------------|--------------|--------------------|
| P <sub>mut</sub> -OEG-NPs | 2h             | growth media   | 0.593      | 5.93E-07    | 105448            | 3.45E-17      | 1.719E+10     | 171884.06    | <b>131981</b>  | <b>26.14</b> | <b>100.0 ± 8.5</b>   |              |                    |
|                           |                |                | 0.4035     | 4.035E-07   |                   |               | 1.17E+10      | 116956.52    |                |              |                      |              |                    |
|                           |                |                | 0.3695     | 3.695E-07   |                   |               | 1.071E+10     | 107101.45    |                |              |                      |              |                    |
|                           |                | adherent cells | 1.6235     | 1.624E-06   |                   |               | 4.706E+10     | 470579.71    |                |              |                      |              |                    |
|                           |                |                | 1.071      | 1.071E-06   |                   |               | 3.104E+10     | 310434.78    |                |              |                      |              |                    |
|                           |                |                | 1.1655     | 1.166E-06   |                   |               | 3.378E+10     | 337826.09    |                |              |                      |              |                    |
|                           | 4h             | growth media   | 0.2925     | 2.925E-07   |                   |               | 8.478E+09     | 84782.609    | <b>68309</b>   | <b>13.53</b> | <b>463043</b>        | <b>91.70</b> | <b>105.2 ± 7</b>   |
|                           |                |                | 0.1925     | 1.925E-07   |                   |               | 5.58E+09      | 55797.101    |                |              |                      |              |                    |
|                           |                |                | 0.222      | 2.22E-07    |                   |               | 6.435E+09     | 64347.826    |                |              |                      |              |                    |
|                           |                | adherent cells | 1.867      | 1.867E-06   |                   |               | 5.412E+10     | 541159.42    |                |              |                      |              |                    |
|                           |                |                | 1.394      | 1.394E-06   |                   |               | 4.041E+10     | 404057.97    |                |              |                      |              |                    |
|                           |                |                | 1.5315     | 1.532E-06   |                   |               | 4.439E+10     | 443913.04    |                |              |                      |              |                    |
|                           | 6h             | growth media   | 0.563      | 5.63E-07    |                   |               | 1.632E+10     | 163188.41    | <b>191836</b>  | <b>37.99</b> | <b>325024</b>        | <b>64.37</b> | <b>102.4 ± 9.5</b> |
|                           |                |                | 0.5475     | 5.475E-07   |                   |               | 1.587E+10     | 158695.65    |                |              |                      |              |                    |
|                           |                |                | 0.875      | 8.75E-07    |                   |               | 2.536E+10     | 253623.19    |                |              |                      |              |                    |
|                           |                | adherent cells | 1.489      | 1.489E-06   |                   |               | 4.316E+10     | 431594.2     |                |              |                      |              |                    |
|                           |                |                | 1.028      | 1.028E-06   |                   |               | 2.98E+10      | 297971.01    |                |              |                      |              |                    |
|                           |                |                | 0.847      | 8.47E-07    |                   |               | 2.455E+10     | 245507.25    |                |              |                      |              |                    |
| P <sub>inh</sub> -OEG-NPs | 2h             | growth media   | 1.394      | 1.394E-06   | 4.041E+10         | 404057.97     | <b>360000</b> | <b>16.80</b> | <b>1783188</b> | <b>83.20</b> | <b>100.0 ± 1.9</b>   |              |                    |
|                           |                |                | 1.4165     | 1.417E-06   | 4.106E+10         | 410579.71     |               |              |                |              |                      |              |                    |
|                           |                |                | 0.9155     | 9.155E-07   | 2.654E+10         | 265362.32     |               |              |                |              |                      |              |                    |
|                           |                | adherent cells | 5.7        | 0.0000057   | 1.652E+11         | 1652173.9     |               |              |                |              |                      |              |                    |
|                           |                |                | 5.267      | 5.267E-06   | 1.527E+11         | 1526666.7     |               |              |                |              |                      |              |                    |
|                           |                |                | 7.489      | 7.489E-06   | 2.171E+11         | 2170724.6     |               |              |                |              |                      |              |                    |
|                           | 4h             | growth media   | 2.4745     | 2.475E-06   | 7.172E+10         | 717246.38     | <b>588358</b> | <b>27.45</b> | <b>1872560</b> | <b>87.37</b> | <b>114.83 ± 18.3</b> |              |                    |
|                           |                |                | 1.9295     | 1.93E-06    | 5.593E+10         | 559275.36     |               |              |                |              |                      |              |                    |
|                           |                |                | 1.6855     | 1.686E-06   | 4.886E+10         | 488550.72     |               |              |                |              |                      |              |                    |
|                           |                | adherent cells | 4.666      | 4.666E-06   | 1.352E+11         | 1352463.8     |               |              |                |              |                      |              |                    |
|                           |                |                | 5.135      | 5.135E-06   | 1.488E+11         | 1488405.8     |               |              |                |              |                      |              |                    |
|                           |                |                | 9.58       | 9.58E-06    | 2.777E+11         | 2776811.6     |               |              |                |              |                      |              |                    |
|                           | 6h             | growth media   | 1.812      | 1.812E-06   | 5.252E+10         | 525217.39     | <b>626618</b> | <b>29.24</b> | <b>140019</b>  | <b>65.33</b> | <b>94.57 ± 10.6</b>  |              |                    |
|                           |                |                | 1.9025     | 1.903E-06   | 5.514E+10         | 551449.28     |               |              |                |              |                      |              |                    |
|                           |                |                | 2.771      | 2.771E-06   | 8.032E+10         | 803188.41     |               |              |                |              |                      |              |                    |
|                           |                | adherent cells | 5.294      | 5.294E-06   | 1.534E+11         | 1534492.8     |               |              |                |              |                      |              |                    |
|                           |                |                | 6.119      | 6.119E-06   | 1.774E+11         | 1773623.2     |               |              |                |              |                      |              |                    |
|                           |                |                | 3.079      | 3.079E-06   | 8.925E+10         | 892463.77     |               |              |                |              |                      |              |                    |
